# Supplementary material for: Air pollution and postpartum depression: the interplay with prenatal stress
Source: Research Square preprint supplement (doi:10.21203/rs.3.rs-8523355/v1), 2026-02-02
Supplement: Supplementary file 1 [file 7b90ff3f7b9b008224ebfa5c.pdf]

# Air pollution and postpartum depression: the interplay with prenatal stress.

Gary Joseph, Megan Niedzwiecki, Itai Kloog, Allan C. Just, Ivan Gutierrez-Avila, Elena Colicino, Martha María Téllez-Rojo, Robert O. Wright, Carmen Hernandez-Chavez, Gabriela Gil Martínez, Rosalind J. Wright, Veerle Bergink, Lauren M. Petrick

## Supplementary materials

Supplementary Figure 1: Association between chronic postpartum depression and average particulate air pollution (PM<sub>2.5</sub>) exposure during pregnancy according to negative life events and perceived stress scores stratum.

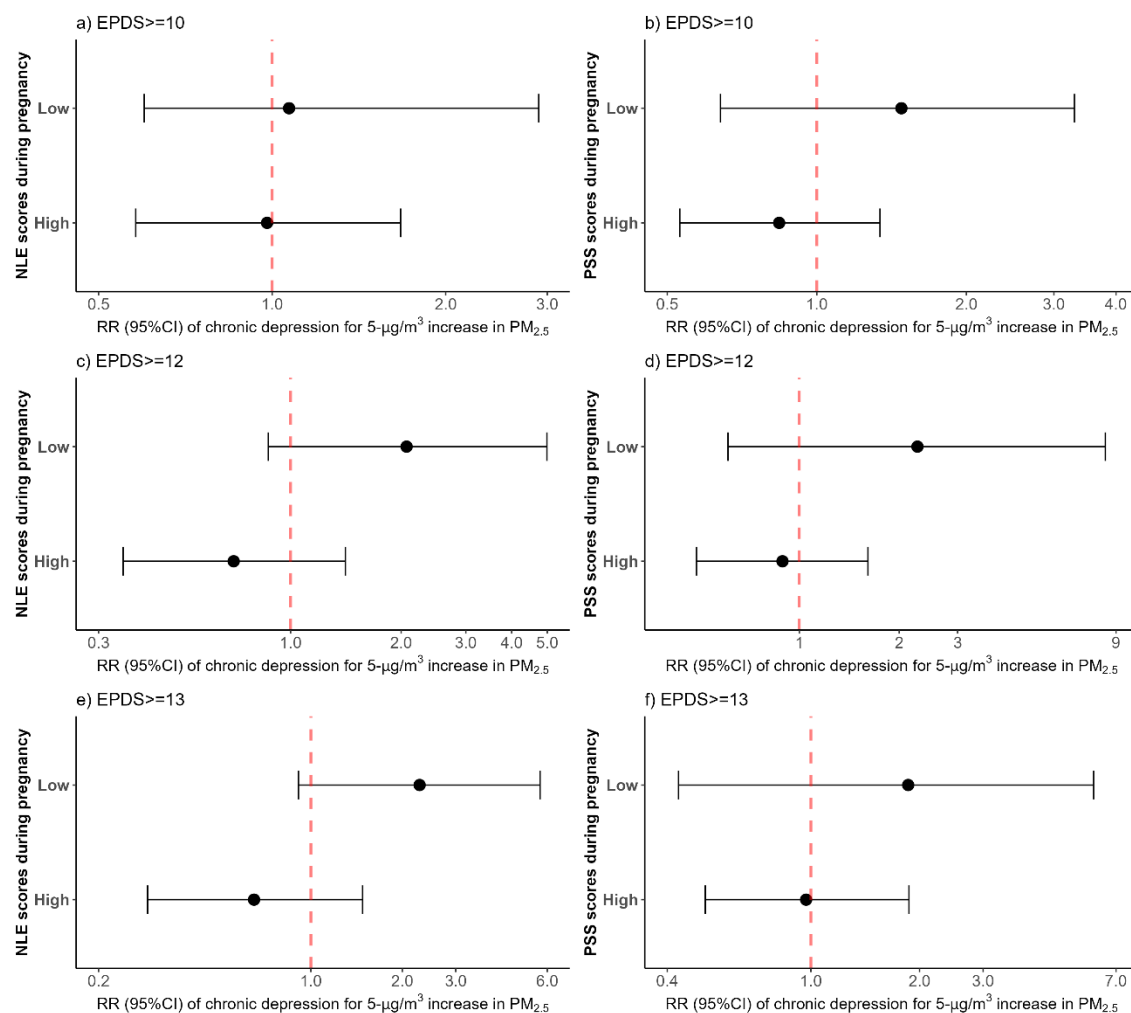

Footnotes: Analyses were adjusted for maternal age, maternal education, socioeconomic status, body mass index, maternal exposure to smoke inside the home, and gestational age at birth. NLE: Negative life events, PSS: Perceived stress scale score. EPDS: Edinburgh Postnatal Depression Scale, PPD: Postpartum depression.; Association between chronic PPD at 6 months postpartum and average particulate air pollution (PM<sub>2.5</sub>) according to NLE stratum for a) EPDS≥10, c) EPDS≥12, and e) EPDS≥13. Association between chronic PPD at 6 months postpartum and average particulate air pollution (PM<sub>2.5</sub>) according to PSS stratum for b) EPDS≥10, d) EPDS≥12, and f) EPDS≥13.

Supplementary Table1: Interaction between average PM<sub>2.5</sub> exposure and negative life events and perceived stress score during pregnancy on postpartum depression at 6 months.

| Postpartum depression        |         | Average PM <sub>2.5</sub> X Negative life events<br>(High vs. Low) |                          | Average PM <sub>2.5</sub> X Perceive stress scale<br>(High vs. Low) |                          |
|------------------------------|---------|--------------------------------------------------------------------|--------------------------|---------------------------------------------------------------------|--------------------------|
|                              |         | RR (95%CI) of the<br>interaction term                              | P-value<br>(interaction) | RR (95%CI) of the<br>interaction term                               | P-value<br>(interaction) |
| Prevalent PPD<br>at 6 months | EPDS≥10 | 1.22 (0.74-2.01)                                                   | 0.438                    | 0.64 (0.39-1.06)                                                    | 0.083                    |
|                              | EPDS≥12 | 1.12 (0.56-2.25)                                                   | 0.74                     | 0.40 (0.19-0.80)                                                    | 0.009                    |
|                              | EPDS≥13 | 1.23 (0.59-2.60)                                                   | 0.578                    | 0.54 (0.25-1.17)                                                    | 0.117                    |
| Chronic PPD at<br>6 months   | EPDS≥10 | 1.05 (0.56-1.96)                                                   | 0.88                     | 0.74 (0.34-1.61)                                                    | 0.444                    |
|                              | EPDS≥12 | 0.43 (0.16-1.13)                                                   | 0.088                    | 0.58 (0.16-2.06)                                                    | 0.399                    |
|                              | EPDS≥13 | 0.36 (0.12-1.10)                                                   | 0.073                    | 0.79 (0.19-3.23)                                                    | 0.748                    |
| new-onset PPD<br>at 6 months | EPDS≥10 | 1.76 (0.68-4.58)                                                   | 0.246                    | 1.93 (0.58-6.44)                                                    | 0.283                    |
|                              | EPDS≥12 | 4.85 (1.63-14.42)                                                  | 0.005                    | 0.42 (0.12-1.43)                                                    | 0.164                    |
|                              | EPDS≥13 | 3.29 (0.98-10.98)                                                  | 0.053                    | 0.26 (0.07-0.91)                                                    | 0.035                    |

EPDS: Edinburgh Postnatal Depression Scale.
